# Supplementary material
Source: PubMed Central journal article supplement (PMC8964501)
Supplement: mmc1.pdf [file mmc1.pdf]

# THE LANCET

## Respiratory Medicine

### Supplementary appendix

This appendix formed part of the original submission and has been peer reviewed. We post it as supplied by the authors.

Supplement to: Shi T, Pan J, Vasileiou E, Robertson C, Sheikh A, on behalf of Public Health Scotland and the EAVE II Collaborators. Risk of serious COVID-19 outcomes among adults with asthma in Scotland: a national incident cohort study. *Lancet Respir Med* 2022; published online Jan 13. [https://doi.org/10.1016/S2213-2600\(21\)00543-9](https://doi.org/10.1016/S2213-2600(21)00543-9).

# 1 Supplementary material

2 *Box 1: Predictor variables in the QCOVID algorithm*

- 3
- 4 • accommodation (homeless, care home, neither)
- 5 • asthma
- 6 • atrial fibrillation
- 7 • blood cancer
- 8 • body mass index (BMI)
- 9 • cerebral palsy
- 10 • chronic kidney disease
- 11 • cirrhosis of liver
- 12 • congenital heart disease
- 13 • congestive cardiac failure
- 14 • chronic obstructive pulmonary disease (COPD)
- 15 • coronary heart disease
- 16 • dementia
- 17 • diabetes 1
- 18 • diabetes 2
- 19 • epilepsy
- 20 • ethnicity
- 21 • learning disability
- 22 • osteoporotic fracture
- 23 • Parkinson's disease
- 24 • peripheral vascular disease
- 25 • pulmonary hypertension or pulmonary fibrosis
- 26 • rare neurological conditions
- 27 • rare pulmonary diseases
- 28 • respiratory cancer
- 29 • rheumatoid arthritis or systemic lupus erythematosus
- 30 • severe mental illness
- 31 • sickle cell disease
- 32 • stroke
- 33 • venous thromboembolism
- 34
- 35

36 *Table S1: ICD-10 codes for COVID-19 illness*

| <b>Code</b>                                                                                                                                               | <b>Description</b>             |
|-----------------------------------------------------------------------------------------------------------------------------------------------------------|--------------------------------|
| U07.1                                                                                                                                                     | COVID-19, virus identified     |
| U07.2                                                                                                                                                     | COVID-19, virus not identified |
| Source: <a href="https://www.who.int/classifications/icd/COVID-19-coding-icd10.pdf">https://www.who.int/classifications/icd/COVID-19-coding-icd10.pdf</a> |                                |

37 ICD-10: International Classification of Diseases 10.

38

39 *Table S2: List of 28 other risk groups of interest included in this study*

| <b>Risk group of interest*</b>                       | <b>Coding</b>                                                |
|------------------------------------------------------|--------------------------------------------------------------|
| Accommodation                                        | Homeless/care home/neither                                   |
| Atrial fibrillation                                  | Yes/no                                                       |
| Blood cancer                                         | Yes/no                                                       |
| Body mass index                                      | <18.5, 18.5-24.99, 25-29.99, 30-34.99, ≥35, and not recorded |
| Cerebral palsy                                       | Yes/no                                                       |
| Chronic kidney disease                               | Yes/no                                                       |
| Cirrhosis of liver                                   | Yes/no                                                       |
| Congenital heart disease                             | Yes/no                                                       |
| Congestive cardiac failure                           | Yes/no                                                       |
| Chronic obstructive pulmonary disease                | Yes/no                                                       |
| Coronary heart disease                               | Yes/no                                                       |
| Dementia                                             | Yes/no                                                       |
| Diabetes type 1                                      | Yes/no                                                       |
| Diabetes type 2                                      | Yes/no                                                       |
| Epilepsy                                             | Yes/no                                                       |
| Learning disability                                  | Yes without Down's syndrome/yes with Down's syndrome/no      |
| Osteoporotic fracture                                | Yes/no                                                       |
| Parkinson's disease                                  | Yes/no                                                       |
| Peripheral vascular disease                          | Yes/no                                                       |
| Pulmonary hypertension or pulmonary fibrosis         | Yes/no                                                       |
| Rare neurological conditions                         | Yes/no                                                       |
| Rare pulmonary diseases                              | Yes/no                                                       |
| Respiratory cancer                                   | Yes/no                                                       |
| rheumatoid arthritis or systemic lupus erythematosus | Yes/no                                                       |
| Severe mental illness                                | Yes/no                                                       |
| Sickle cell disease                                  | Yes/no                                                       |
| Stroke                                               | Yes/no                                                       |
| Venous thromboembolism                               | Yes/no                                                       |

\*Ethnicity data were missing on 42% of participants therefore not included.

40  
41

|                           | Item No | Recommendation                                                                                                                                                                                    | Location            |
|---------------------------|---------|---------------------------------------------------------------------------------------------------------------------------------------------------------------------------------------------------|---------------------|
| <b>Title and abstract</b> | 1       | (a) Indicate the study's design with a commonly used term in the title or the abstract                                                                                                            | Page 2              |
|                           |         | (b) Provide in the abstract an informative and balanced summary of what was done and what was found                                                                                               | Page 2              |
| <b>Introduction</b>       |         |                                                                                                                                                                                                   |                     |
| Background/rationale      | 2       | Explain the scientific background and rationale for the investigation being reported                                                                                                              | Page 4              |
| Objectives                | 3       | State specific objectives, including any prespecified hypotheses                                                                                                                                  | Page 4              |
| <b>Methods</b>            |         |                                                                                                                                                                                                   |                     |
| Study design              | 4       | Present key elements of study design early in the paper                                                                                                                                           | Page 4              |
| Setting                   | 5       | Describe the setting, locations, and relevant dates, including periods of recruitment, exposure, follow-up, and data collection                                                                   | Page 4              |
| Participants              | 6       | (a) Give the eligibility criteria, and the sources and methods of selection of participants. Describe methods of follow-up                                                                        | Page 4              |
|                           |         | (b) For matched studies, give matching criteria and number of exposed and unexposed                                                                                                               | NA                  |
| Variables                 | 7       | Clearly define all outcomes, exposures, predictors, potential confounders, and effect modifiers. Give diagnostic criteria, if applicable                                                          | Page 4-5            |
| Data sources/measurement  | 8*      | For each variable of interest, give sources of data and details of methods of assessment (measurement). Describe comparability of assessment methods if there is more than one group              | Page 5              |
| Bias                      | 9       | Describe any efforts to address potential sources of bias                                                                                                                                         | Page 5              |
| Study size                | 10      | Explain how the study size was arrived at                                                                                                                                                         | Page 5              |
| Quantitative variables    | 11      | Explain how quantitative variables were handled in the analyses. If applicable, describe which groupings were chosen and why                                                                      | Page 5              |
| Statistical methods       | 12      | (a) Describe all statistical methods, including those used to control for confounding                                                                                                             | Pages 5-6           |
|                           |         | (b) Describe any methods used to examine subgroups and interactions                                                                                                                               | Page 6              |
|                           |         | (c) Explain how missing data were addressed                                                                                                                                                       | Page 5              |
|                           |         | (d) If applicable, explain how loss to follow-up was addressed                                                                                                                                    | NA                  |
|                           |         | (e) Describe any sensitivity analyses                                                                                                                                                             | NA                  |
| <b>Results</b>            |         |                                                                                                                                                                                                   |                     |
| Participants              | 13*     | (a) Report numbers of individuals at each stage of study—eg numbers potentially eligible, examined for eligibility, confirmed eligible, included in the study, completing follow-up, and analysed | Page 7              |
|                           |         | (b) Give reasons for non-participation at each stage                                                                                                                                              | NA                  |
|                           |         | (c) Consider use of a flow diagram                                                                                                                                                                | Page 5<br>Figure S1 |
| Descriptive data          | 14*     | (a) Give characteristics of study participants (eg demographic, clinical, social) and information on exposures and potential confounders                                                          | Page 7              |
|                           |         | (b) Indicate number of participants with missing data for each variable of interest                                                                                                               | Page 5,<br>Table S2 |
|                           |         | (c) Summarise follow-up time (eg, average and total amount)                                                                                                                                       | Page 5              |

|                          |     |                                                                                                                                                                                                              |                        |
|--------------------------|-----|--------------------------------------------------------------------------------------------------------------------------------------------------------------------------------------------------------------|------------------------|
| Outcome data             | 15* | Report numbers of outcome events or summary measures over time                                                                                                                                               | Page 7                 |
| Main results             | 16  | (a) Give unadjusted estimates and, if applicable, confounder-adjusted estimates and their precision (eg, 95% confidence interval). Make clear which confounders were adjusted for and why they were included | Pages 7-8<br>Table S12 |
|                          |     | (b) Report category boundaries when continuous variables were categorized                                                                                                                                    | NA                     |
|                          |     | (c) If relevant, consider translating estimates of relative risk into absolute risk for a meaningful time period                                                                                             | NA                     |
| Other analyses           | 17  | Report other analyses done—eg analyses of subgroups and interactions, and sensitivity analyses                                                                                                               | Page 8                 |
| <b>Discussion</b>        |     |                                                                                                                                                                                                              |                        |
| Key results              | 18  | Summarise key results with reference to study objectives                                                                                                                                                     | Page 8                 |
| Limitations              | 19  | Discuss limitations of the study, taking into account sources of potential bias or imprecision. Discuss both direction and magnitude of any potential bias                                                   | Page 9                 |
| Interpretation           | 20  | Give a cautious overall interpretation of results considering objectives, limitations, multiplicity of analyses, results from similar studies, and other relevant evidence                                   | Page 9                 |
| Generalisability         | 21  | Discuss the generalisability (external validity) of the study results                                                                                                                                        | Page 9                 |
| <b>Other information</b> |     |                                                                                                                                                                                                              |                        |
| Funding                  | 22  | Give the source of funding and the role of the funders for the present study and, if applicable, for the original study on which the present article is based                                                | Page 10                |

43 \*Give information separately for exposed and unexposed groups. STROBE: Strengthening the Reporting of  
44 Observational studies in Epidemiology. NA: not applicable.

| Variable               | Level           | Overall number | With asthma   | Asthma with no prior hospitalisation* | Asthma with prior hospitalisation* | Asthma with 0 OCS <sup>^</sup> | Asthma with 1 OCS <sup>^</sup> | Asthma with 2 OCS <sup>^</sup> | Asthma with ≥3 OCS <sup>^</sup> |
|------------------------|-----------------|----------------|---------------|---------------------------------------|------------------------------------|--------------------------------|--------------------------------|--------------------------------|---------------------------------|
| Total                  | Total           | 4421663 (100)  | 561279 (100)  | 555833 (100)                          | 6110 (100)                         | 440388 (100)                   | 142583 (100)                   | 50880 (100)                    | 107496 (100)                    |
| Age                    | 18-64 years old | 3385418 (76.6) | 452112 (80.6) | 447923 (80.6)                         | 4641 (76)                          | 368224 (83.6)                  | 93443 (65.5)                   | 30648 (60.2)                   | 49186 (45.8)                    |
| Age                    | 65-79 years old | 766350 (17.3)  | 83994 (15)    | 83069 (14.9)                          | 1042 (17.1)                        | 55578 (12.6)                   | 35802 (25.1)                   | 14793 (29.1)                   | 40731 (37.9)                    |
| Age                    | ≥80 years old   | 269895 (6.1)   | 25173 (4.5)   | 24841 (4.5)                           | 426 (7)                            | 16586 (3.8)                    | 13339 (9.4)                    | 5439 (10.7)                    | 17579 (16.4)                    |
| Prior hospitalisation§ | 0               | 3516527 (79.5) | 427119 (76.1) | 424321 (76.3)                         | 3078 (50.4)                        | 351579 (79.8)                  | 90435 (63.4)                   | 28968 (56.9)                   | 47835 (44.5)                    |
| Prior hospitalisation  | 1               | 533418 (12.1)  | 78336 (14)    | 77167 (13.9)                          | 1301 (21.3)                        | 55212 (12.5)                   | 26378 (18.5)                   | 10059 (19.8)                   | 23200 (21.6)                    |
| Prior hospitalisation  | 2               | 187268 (4.2)   | 28377 (5.1)   | 27790 (5)                             | 658 (10.8)                         | 18171 (4.1)                    | 11333 (7.9)                    | 5013 (9.9)                     | 13264 (12.3)                    |
| Prior hospitalisation  | ≥3              | 184450 (4.2)   | 27447 (4.9)   | 26554 (4.8)                           | 1073 (17.6)                        | 15426 (3.5)                    | 14437 (10.1)                   | 6840 (13.4)                    | 23197 (21.6)                    |
| Sex                    | Female          | 2288128 (51.7) | 304213 (54.2) | 300283 (54)                           | 4371 (71.5)                        | 224167 (50.9)                  | 87428 (61.3)                   | 32133 (63.2)                   | 67594 (62.9)                    |
| Sex                    | Male            | 2133535 (48.3) | 257066 (45.8) | 255550 (46)                           | 1738 (28.4)                        | 216221 (49.1)                  | 55155 (38.7)                   | 18747 (36.8)                   | 39902 (37.1)                    |
| SIMD#                  | 1 - High        | 871447 (19.7)  | 123595 (22)   | 121928 (21.9)                         | 1856 (30.4)                        | 92083 (20.9)                   | 35346 (24.8)                   | 13275 (26.1)                   | 26760 (24.9)                    |
| SIMD                   | 2               | 869700 (19.7)  | 116795 (20.8) | 115476 (20.8)                         | 1502 (24.6)                        | 89666 (20.4)                   | 31531 (22.1)                   | 11624 (22.8)                   | 24285 (22.6)                    |
| SIMD                   | 3               | 875083 (19.8)  | 108219 (19.3) | 107229 (19.3)                         | 1130 (18.5)                        | 85011 (19.3)                   | 28119 (19.7)                   | 9911 (19.5)                    | 21530 (20)                      |
| SIMD                   | 4               | 876772 (19.8)  | 107601 (19.2) | 106788 (19.2)                         | 897 (14.7)                         | 86661 (19.7)                   | 25658 (18)                     | 8756 (17.2)                    | 19083 (17.8)                    |
| SIMD                   | 5 - Low         | 886527 (20)    | 101481 (18.1) | 100852 (18.1)                         | 686 (11.2)                         | 83999 (19.1)                   | 21042 (14.8)                   | 7011 (13.8)                    | 15199 (14.1)                    |

|                       |                |                   |               |               |             |                  |                 |                 |                 |
|-----------------------|----------------|-------------------|---------------|---------------|-------------|------------------|-----------------|-----------------|-----------------|
| SIMD                  | NA             | 42132<br>(1)      | 3589 (0.6)    | 3560 (0.6)    | 39 (0.6)    | 2966 (0.7)       | 886 (0.6)       | 302 (0.6)       | 639 (0.6)       |
| BMI (kg/m2)           | <18.5          | 49520<br>(1.1)    | 7039 (1.3)    | 6961 (1.3)    | 84 (1.4)    | 5218 (1.2)       | 2036 (1.4)      | 902 (1.8)       | 2519<br>(2.3)   |
| BMI                   | 18.5-<br>24.99 | 550329<br>(12.4)  | 77429 (13.8)  | 76781 (13.8)  | 698 (11.4)  | 60401<br>(13.7)  | 18847<br>(13.2) | 7099<br>(14)    | 17005<br>(15.8) |
| BMI                   | 25-29.99       | 3055117<br>(69.1) | 336209 (59.9) | 333744 (60)   | 2947 (48.2) | 278212<br>(63.2) | 79167<br>(55.5) | 26351<br>(51.8) | 53171<br>(49.5) |
| BMI                   | 30-34.99       | 430478<br>(9.7)   | 74591 (13.3)  | 73599 (13.2)  | 1043 (17.1) | 52750 (12)       | 21725<br>(15.2) | 8158<br>(16)    | 16728<br>(15.6) |
| BMI                   | ≥35            | 292751<br>(6.6)   | 61009 (10.9)  | 59829 (10.8)  | 1237 (20.2) | 40848<br>(9.3)   | 17855<br>(12.5) | 7025<br>(13.8)  | 13300<br>(12.4) |
| BMI                   | NA             | 43467<br>(1)      | 5003 (0.9)    | 4919 (0.9)    | 101 (1.7)   | 2958 (0.7)       | 2953 (2.1)      | 1344<br>(2.6)   | 4773<br>(4.4)   |
| Number of risk groups | 0              | 2971660<br>(67.2) | 330585 (58.9) | 328349 (59.1) | 2715 (44.4) | 279187<br>(63.4) | 69403<br>(48.7) | 21403<br>(42.1) | 34320<br>(31.9) |
| Number of risk groups | 1              | 914063<br>(20.7)  | 141512 (25.2) | 139896 (25.2) | 1710 (28)   | 106660<br>(24.2) | 37616<br>(26.4) | 13704<br>(26.9) | 27903<br>(26)   |
| Number of risk groups | 2              | 311003<br>(7)     | 50868 (9.1)   | 50020 (9)     | 902 (14.8)  | 33063<br>(7.5)   | 18453<br>(12.9) | 7902<br>(15.5)  | 20518<br>(19.1) |
| Number of risk groups | 3              | 129051<br>(2.9)   | 21542 (3.8)   | 21138 (3.8)   | 419 (6.9)   | 12600<br>(2.9)   | 9145 (6.4)      | 4124<br>(8.1)   | 12341<br>(11.5) |
| Number of risk groups | 4              | 57234<br>(1.3)    | 9727 (1.7)    | 9522 (1.7)    | 213 (3.5)   | 5286 (1.2)       | 4530 (3.2)      | 2074<br>(4.1)   | 6875<br>(6.4)   |
| Number of risk groups | ≥5             | 38652<br>(0.9)    | 7045 (1.3)    | 6909 (1.2)    | 151 (2.5)   | 3592 (0.8)       | 3438 (2.4)      | 1673<br>(3.3)   | 5539<br>(5.2)   |

46 Data are n (%). \* Hospitalisation for asthma within two-year period prior to March 1, 2020. ^ Oral corticosteroids prescriptions for prednisolone, prednisone and  
47 dexamethasone in two-year period prior to March 1, 2020. § Number of non-asthma hospitalisations within two-year period prior to March 1, 2020. # 1 indicates most  
48 deprived, 5 indicates least deprived. OCS: oral corticosteroid. SIMD: Scottish Index of Multiple Deprivation. BMI: body mass index. NA: not available.



49 **Table S5: Hazard ratio for COVID-19 hospitalisation comparing those with different vaccine status and those with no**  
 50 **vaccine stratified by markers of an asthma attack defined by the OCS use in the two years prior to March 1, 2020**  
 51

| Vaccine status          | OCS courses as marker of history of an asthma attack | Number of event | aHR (95% CI)     |
|-------------------------|------------------------------------------------------|-----------------|------------------|
| Unvaccinated            | no asthma                                            | 17950           | 1                |
| 0-27 days post 1st dose | no asthma                                            | 1262            | 0.75 (0.7-0.8)   |
| 28+ days post 1st dose  | no asthma                                            | 439             | 0.28 (0.25-0.31) |
| 0-27 days post 2nd dose | no asthma                                            | 222             | 0.22 (0.19-0.26) |
| 28+ days post 2nd dose  | no asthma                                            | 665             | 0.15 (0.14-0.17) |
| Unvaccinated            | 0                                                    | 2448            | 1                |
| 0-27 days post 1st dose | 0                                                    | 166             | 0.67 (0.57-0.8)  |
| 28+ days post 1st dose  | 0                                                    | 67              | 0.3 (0.24-0.39)  |
| 0-27 days post 2nd dose | 0                                                    | 38              | 0.26 (0.19-0.37) |
| 28+ days post 2nd dose  | 0                                                    | 94              | 0.15 (0.12-0.19) |
| Unvaccinated            | 1                                                    | 1577            | 1                |
| 0-27 days post 1st dose | 1                                                    | 107             | 0.66 (0.53-0.81) |
| 28+ days post 1st dose  | 1                                                    | 35              | 0.25 (0.18-0.35) |
| 0-27 days post 2nd dose | 1                                                    | 17              | 0.2 (0.12-0.32)  |
| 28+ days post 2nd dose  | 1                                                    | 74              | 0.17 (0.13-0.21) |
| Unvaccinated            | 2                                                    | 680             | 1                |
| 0-27 days post 1st dose | 2                                                    | 55              | 0.79 (0.59-1.05) |
| 28+ days post 1st dose  | 2                                                    | 24              | 0.41 (0.27-0.62) |
| 0-27 days post 2nd dose | 2                                                    | 9               | 0.25 (0.13-0.5)  |
| 28+ days post 2nd dose  | 2                                                    | 44              | 0.22 (0.16-0.31) |
| Unvaccinated            | 3+                                                   | 2165            | 1                |
| 0-27 days post 1st dose | 3+                                                   | 140             | 0.64 (0.54-0.77) |
| 28+ days post 1st dose  | 3+                                                   | 40              | 0.22 (0.16-0.31) |
| 0-27 days post 2nd dose | 3+                                                   | 34              | 0.34 (0.24-0.48) |
| 28+ days post 2nd dose  | 3+                                                   | 152             | 0.23 (0.19-0.28) |

52 aHR: adjusted hazard ratio. CI: confidence interval. OCS: oral corticosteroid. Hazard ratios were derived using  
 53 cox proportional hazard model adjusting for age, sex, socioeconomic status, body mass index, number of risk  
 54 groups of interest, number of non-asthma related hospitalisations within the two-year period prior to March 1,  
 55 2020. 42% of the cohort have missing ethnicity so this variable is not adjusted for in the Cox model and 1% of  
 56 the cohort have missing SIMD or BMI and this 1% were excluded in the adjusted Cox model. \* Two-year look  
 57 back from March 1, 2020. Interaction test p value 0.002.  
 58

59  
60  
61  
62

**Table S6: Hazard ratio for COVID-19 hospitalisation and COVID-19 ICU admissions/ deaths comparing those with markers of an asthma attack defined by the OCS use in the two years prior to March 1, 2020 stratified by different time periods during pandemic**

| Asthma severity marker defined by prior OCS courses | COVID-19 hospitalisation |                  | COVID-19 ICU/deaths |                  |
|-----------------------------------------------------|--------------------------|------------------|---------------------|------------------|
|                                                     | Number of events         | aHR (95% CI)     | Number of events    | aHR (95% CI)     |
| March 1, 2020 to July 31, 2020                      |                          |                  |                     |                  |
| No asthma                                           | 4883                     | 1                | 3518                | 1                |
| Asthma with 0 course of OCS                         | 658                      | 1.21 (1.1-1.33)  | 308                 | 1.24 (0.92-1.67) |
| Asthma with 1 course of OCS                         | 451                      | 1.27 (1.13-1.44) | 243                 | 0.89 (0.53-1.48) |
| Asthma with 2 courses of OCS                        | 191                      | 1.3 (1.08-1.55)  | 102                 | 1.94 (1.13-3.34) |
| Asthma with ≥3 courses of OCS                       | 686                      | 1.56 (1.4-1.74)  | 398                 | 1.9 (1.27-2.84)  |
| August 1, 2020 to December 7, 2020                  |                          |                  |                     |                  |
| No asthma                                           | 5331                     | 1                | 1758                | 1                |
| Asthma with 0 course of OCS                         | 698                      | 1.1 (1.01-1.2)   | 190                 | 0.92 (0.68-1.24) |
| Asthma with 1 course of OCS                         | 479                      | 1.27 (1.14-1.41) | 132                 | 1.31 (0.91-1.89) |
| Asthma with 2 courses of OCS                        | 225                      | 1.3 (1.11-1.52)  | 76                  | 2.06 (1.3-3.24)  |
| Asthma with ≥3 courses of OCS                       | 666                      | 1.4 (1.27-1.54)  | 224                 | 1.97 (1.42-2.75) |
| December 8, 2020 to May 18, 2021                    |                          |                  |                     |                  |
| No asthma                                           | 8328                     | 1                | 3572                | 1                |
| Asthma with 0 course of OCS                         | 1142                     | 1.14 (1.07-1.21) | 412                 | 1.27 (1.04-1.54) |
| Asthma with 1 course of OCS                         | 734                      | 1.3 (1.21-1.41)  | 284                 | 1.05 (0.95-1.17) |
| Asthma with 2 courses of OCS                        | 313                      | 1.33 (1.19-1.49) | 141                 | 1.03 (0.91-1.16) |
| Asthma with ≥3 courses of OCS                       | 973                      | 1.54 (1.44-1.65) | 460                 | 1.2 (1-1.42)     |
| May 19, 2021 to 27 July, 2021                       |                          |                  |                     |                  |
| No asthma                                           | 1996                     | 1                | 345                 | 1                |
| Asthma with 0 course of OCS                         | 315                      | 1.15 (1.02-1.3)  | 45                  | 1.05 (0.77-1.44) |
| Asthma with 1 course of OCS                         | 146                      | 1.39 (1.17-1.65) | 22                  | 1.06 (0.69-1.65) |
| Asthma with 2 courses of OCS                        | 83                       | 1.99 (1.59-2.49) | 11                  | 1.29 (0.71-2.36) |
| Asthma with ≥3 courses of OCS                       | 206                      | 2.05 (1.75-2.39) | 52                  | 2.24 (1.63-3.08) |

63 aHR: adjusted hazard ratio. CI: confidence interval. ICU: intensive care unit. OCS: oral corticosteroid. Hazard  
64 ratios were derived using cox proportional hazard model adjusting for age, sex, socioeconomic status, body  
65 mass index, number of risk groups of interest, number of non-asthma related hospitalisations within the two-  
66 year period prior to March 1, 2020 and vaccine status. ICU/deaths referred to those who had COVID-19 related  
67 ICU admissions or COVID-19 related death with or without previous ICU admissions. 42% of the cohort had  
68 missing ethnicity so this variable was not adjusted for in the Cox model. 1% of the cohort had missing SIMD or  
69 BMI and this 1% were excluded in the adjusted Cox model. ICU/deaths include those had COVID-19 related ICU  
70 admissions or COVID-19 related death with or without previous ICU admissions.  
71

72 **Table S7: Hazard ratio for COVID-19 hospitalisation, ICU admission and deaths comparing those with different markers**  
 73 **of history of an asthma attack (defined in the two years prior to March 1, 2020) and those with no asthma in adults**

|                                                                                | COVID-19 hospitalisation |                  | COVID-19 ICU admission |                  | COVID-19 deaths  |                  |
|--------------------------------------------------------------------------------|--------------------------|------------------|------------------------|------------------|------------------|------------------|
| Risk group                                                                     | Number of events         | aHR (95% CI)     | Number of events       | aHR (95% CI)     | Number of events | aHR (95% CI)     |
| Use previous prescribed OCS as marker of history of an asthma attack*          |                          |                  |                        |                  |                  |                  |
| No asthma                                                                      | 20678                    | 1                | 2198                   | 1                | 7561             | 1                |
| Asthma with 0 course of OCS                                                    | 2827                     | 1.15 (1.11-1.21) | 297                    | 1.11 (0.97-1.27) | 732              | 1.03 (0.91-1.15) |
| Asthma with 1 course of OCS                                                    | 1817                     | 1.30 (1.23-1.37) | 171                    | 1.23 (1.03-1.48) | 568              | 0.98 (0.86-1.12) |
| Asthma with 2 courses of OCS                                                   | 814                      | 1.37 (1.26-1.48) | 88                     | 1.61 (1.25-2.07) | 268              | 1.12 (0.93-1.35) |
| Asthma with ≥3 courses of OCS                                                  | 2553                     | 1.54 (1.46-1.61) | 225                    | 1.89 (1.6-2.22)  | 990              | 1.39 (1.25-1.54) |
| Use prior hospitalisation for asthma as marker of history of an asthma attack* |                          |                  |                        |                  |                  |                  |
| No asthma                                                                      | 23845                    | 1                | 2463                   | 1                | 8909             | 1                |
| Asthma without prior hospitalisation                                           | 4643                     | 1.24 (1.2-1.29)  | 498                    | 1.26 (1.13-1.4)  | 1178             | 0.99 (0.9-1.09)  |
| Asthma with prior hospitalisation                                              | 201                      | 3.01 (2.59-3.49) | 18                     | 3.48 (2.16-5.6)  | 32               | 1.84 (1.13-3.02) |

74 aHR: adjusted hazard ratio. CI: confidence interval. ICU: intensive care unit. OCS: oral corticosteroid. Hazard  
 75 ratios were derived using cox proportional hazard model adjusting for age, sex, socioeconomic status, body  
 76 mass index, number of risk groups of interest, number of non-asthma related hospitalisations within the two-  
 77 year period prior to March 1, 2020 and vaccine status. \* Two-year look back on all markers of history of an  
 78 asthma attack was from March 1, 2020. ICU/deaths referred to those who had COVID-19 related ICU  
 79 admissions or COVID-19 related death with or without previous ICU admissions. 42% of the cohort had missing  
 80 ethnicity so this variable was not adjusted for in the Cox model. 1% of the cohort had missing SIMD or BMI and  
 81 this 1% were excluded in the adjusted Cox model.  
 82

83 **Table S8: Hazard ratio for COVID-19 hospitalisation, ICU admission and deaths comparing those with different markers**  
 84 **of history of an asthma attack (defined in the one year prior to March 1, 2020) and those with no asthma in adults**

| Risk group                                                                     | COVID-19 hospitalisation |                  | COVID-19 ICU/deaths |                  | COVID-19 deaths  |                  |
|--------------------------------------------------------------------------------|--------------------------|------------------|---------------------|------------------|------------------|------------------|
|                                                                                | Number of events         | aHR (95% CI)     | Number of events    | aHR (95% CI)     | Number of events | aHR (95% CI)     |
| Use previous prescribed OCS as marker of history of an asthma attack*          |                          |                  |                     |                  |                  |                  |
| No asthma                                                                      | 21487                    | 1                | 9554                | 1                | 7875             | 1                |
| Asthma with 0 course of OCS                                                    | 3343                     | 1.19 (1.14-1.24) | 1107                | 1.06 (0.97-1.15) | 845              | 1 (0.9-1.12)     |
| Asthma with 1 course of OCS                                                    | 1464                     | 1.33 (1.26-1.41) | 535                 | 0.98 (0.86-1.12) | 450              | 0.94 (0.8-1.09)  |
| Asthma with 2 courses of OCS                                                   | 634                      | 1.41 (1.29-1.54) | 266                 | 1.38 (1.17-1.64) | 216              | 1.2 (0.97-1.47)  |
| Asthma with ≥3 courses of OCS                                                  | 1761                     | 1.67 (1.58-1.76) | 831                 | 1.7 (1.53-1.88)  | 733              | 1.65 (1.47-1.86) |
| Use prior hospitalisation for asthma as marker of history of an asthma attack* |                          |                  |                     |                  |                  |                  |
| No asthma                                                                      | 23849                    | 1                | 10690               | 1                | 8910             | 1                |
| Asthma without prior hospitalisation                                           | 4717                     | 1.26 (1.21-1.3)  | 1578                | 1.12 (1.04-1.21) | 1193             | 1 (0.91-1.1)     |
| Asthma with prior hospitalisation                                              | 123                      | 3.19 (2.63-3.86) | 25                  | 2.12 (1.3-3.46)  | 16               | 1.58 (0.78-3.22) |

85 aHR: adjusted hazard ratio. CI: confidence interval. ICU: intensive care unit. OCS: oral corticosteroid. Hazard  
 86 ratios were derived using cox proportional hazard model adjusting for age, sex, socioeconomic status, body  
 87 mass index, number of risk groups of interest, number of non-asthma related hospitalisations within the two-  
 88 year period prior to March 1, 2020 and vaccine status. \* One-year look back on all markers of history of an  
 89 asthma attack was from March 1, 2020. ICU/deaths referred to those who had COVID-19 related ICU  
 90 admissions or COVID-19 related death with or without previous ICU admissions. 42% of the cohort had missing  
 91 ethnicity so this variable was not adjusted for in the Cox model. 1% of the cohort had missing SIMD or BMI and  
 92 this 1% were excluded in the adjusted Cox model.  
 93

94 **Table S9: Hazard ratio for COVID-19 hospitalisation, ICU admission and deaths comparing those with different markers**  
 95 **of history of an asthma attack and those with no asthma following positive COVID-19 test**  
 96

| Risk group                                                                     | COVID-19 hospitalisation |                  | COVID-19 ICU/deaths |                  | COVID-19 deaths  |                  |
|--------------------------------------------------------------------------------|--------------------------|------------------|---------------------|------------------|------------------|------------------|
|                                                                                | Number of events         | aHR (95% CI)     | Number of events    | aHR (95% CI)     | Number of events | aHR (95% CI)     |
| Use previous prescribed OCS as marker of history of an asthma attack*          |                          |                  |                     |                  |                  |                  |
| No asthma                                                                      | 19439                    | 1                | 8711                | 1                | 7162             | 1                |
| Asthma with 0 course of OCS                                                    | 3674                     | 1.09 (1.04-1.15) | 1476                | 1.01 (0.91-1.11) | 1260             | 1.03 (0.91-1.17) |
| Asthma with 1 course of OCS                                                    | 2384                     | 1.35 (1.29-1.42) | 831                 | 1.3 (1.18-1.43)  | 648              | 1.29 (1.15-1.45) |
| Asthma with 2 courses of OCS                                                   | 2182                     | 1.5 (1.4-1.61)   | 873                 | 1.36 (1.18-1.56) | 724              | 1.27 (1.07-1.5)  |
| Asthma with ≥3 courses of OCS                                                  | 1010                     | 1.87 (1.8-1.95)  | 402                 | 1.6 (1.48-1.74)  | 325              | 1.53 (1.4-1.68)  |
| Use prior hospitalisation for asthma as marker of history of an asthma attack* |                          |                  |                     |                  |                  |                  |
| No asthma                                                                      | 23838                    | 1                | 10686               | 1                | 8906             | 1                |
| Asthma without prior hospitalisation                                           | 4630                     | 1.2 (1.16-1.25)  | 1557                | 1.06 (0.98-1.14) | 1178             | 0.97 (0.88-1.07) |
| Asthma with prior hospitalisation                                              | 221                      | 3 (2.61-3.46)    | 50                  | 1.78 (1.26-2.51) | 35               | 1.53 (0.97-2.42) |

97 aHR: adjusted hazard ratio. CI: confidence interval. ICU: intensive care unit. OCS: oral corticosteroid. Hazard  
 98 ratios were derived using cox proportional hazard model adjusting for age, sex, socioeconomic status, body  
 99 mass index, number of risk groups of interest, number of non-asthma related hospitalisations within the two-  
 100 year period prior to March 1, 2020, the time from March 1, 2020 to the date of infection (this is to adjust for  
 101 different waves/dominant variants at baseline) and vaccine status. The vaccine status was measured at the  
 102 date of positive COVID-19 test. \* Two-year look back on all markers of history of an asthma attack was from  
 103 the date of positive COVID-19 test. ICU/deaths include those had COVID-19 related ICU admissions or COVID-  
 104 19 related death with or without previous ICU admissions.  
 105

106  
107  
108

**Table S10: Hazard ratio for COVID-19 hospitalisation comparing those with different markers of history of an asthma attack (defined in the two years prior to March 1, 2020) and those with no asthma stratifying by the COPD status**

|                                                                                | No COPD                  |                  | With COPD                |                  |
|--------------------------------------------------------------------------------|--------------------------|------------------|--------------------------|------------------|
|                                                                                | COVID-19 hospitalisation |                  | COVID-19 hospitalisation |                  |
| Risk group                                                                     | Number of events         | aHR (95% CI)     | Number of events         | aHR (95% CI)     |
| Use previous prescribed OCS as marker of history of an asthma attack*          |                          |                  |                          |                  |
| No asthma                                                                      | 19316                    | 1                | 1222                     | 1                |
| Asthma with 0 course of OCS                                                    | 2509                     | 1.17 (1.12-1.22) | 304                      | 0.99 (0.86-1.14) |
| Asthma with 1 course of OCS                                                    | 1331                     | 1.38 (1.29-1.46) | 479                      | 1.07 (0.95-1.21) |
| Asthma with 2 courses of OCS                                                   | 519                      | 1.49 (1.36-1.64) | 293                      | 1.15 (0.99-1.33) |
| Asthma with ≥3 courses of OCS                                                  | 1442                     | 1.64 (1.54-1.74) | 1089                     | 1.39 (1.27-1.53) |
| Use prior hospitalisation for asthma as marker of history of an asthma attack* |                          |                  |                          |                  |
| No asthma                                                                      | 21200                    | 1                | 2482                     | 1                |
| Asthma without prior hospitalisation                                           | 3746                     | 1.29 (1.24-1.34) | 876                      | 1.02 (0.93-1.11) |
| Asthma with prior hospitalisation                                              | 171                      | 3.41 (2.9-4)     | 29                       | 1.7 (1.13-2.54)  |

109 aHR: adjusted hazard ratio. CI: confidence interval. OCS: oral corticosteroid. Hazard ratios were derived using  
110 cox proportional hazard model adjusting for age, sex, socioeconomic status, body mass index, number of risk  
111 groups of interest, number of non-asthma related hospitalisations within the two-year period prior to March 1,  
112 2020 and vaccine status. \* Two-year look back on all markers of history of an asthma attack was from March 1,  
113 2020. The interaction test between COPD and severity maker defined by prior asthma related hospitalisation  
114 had p value as <0.0001. The interaction test between COPD and severity maker defined by OCS use had p value  
115 as <0.0001.

116 The aHR of COVID-19 hospitalisation comparing those with a history of asthma attack vs those with no asthma  
117 is higher in the subset with no co-diagnosed of COPD compared to the subset with co-diagnosed COPD. This is  
118 because the reference group in the subset with COPD was a sicker population (those with COPD but with no  
119 asthma – the unadjusted HR of COPD was 4.45 (4.29-4.61) for COVID-19 hospitalisation compared to no COPD  
120 – shown in Table S12) while the reference group in the subset without COPD was those with neither asthma  
121 nor COPD. Our results show that for the group without COPD, asthma had a stronger impact on COVID-19  
122 hospitalisation compared to the group with COPD.

123 **Table S11: Hazard ratio for COVID-19 hospitalisation, ICU admission and deaths comparing those with different markers**  
 124 **of history of an asthma attack (defined in the two years prior to March 1, 2020) and those with no asthma in the adults <**  
 125 **50 years old**

| Risk group                                                                     | COVID-19 hospitalisation |                  | COVID-19 ICU/deaths |                   |
|--------------------------------------------------------------------------------|--------------------------|------------------|---------------------|-------------------|
|                                                                                | Number of events         | aHR (95% CI)     | Number of events    | aHR (95% CI)      |
| Use previous prescribed OCS as marker of history of an asthma attack*          |                          |                  |                     |                   |
| No asthma                                                                      | 4597                     | 1                | 614                 | 1                 |
| Asthma with 0 course of OCS                                                    | 837                      | 1.15 (1.07-1.25) | 120                 | 1.25 (1.01-1.54)  |
| Asthma with 1 course of OCS                                                    | 340                      | 1.75 (1.56-1.97) | 43                  | 1.6 (1.14-2.24)   |
| Asthma with 2 courses of OCS                                                   | 124                      | 1.83 (1.52-2.2)  | 14                  | 1.33 (0.72-2.42)  |
| Asthma with ≥3 courses of OCS                                                  | 286                      | 2.53 (2.22-2.89) | 69                  | 4.15 (3.07-5.6)   |
| Use prior hospitalisation for asthma as marker of history of an asthma attack* |                          |                  |                     |                   |
| No asthma                                                                      | 4896                     | 1                | 666                 | 1                 |
| Asthma without prior hospitalisation                                           | 1216                     | 1.3 (1.21-1.38)  | 181                 | 1.42 (1.19-1.69)  |
| Asthma with prior hospitalisation                                              | 72                       | 4.12 (3.22-5.27) | 13                  | 6.13 (3.43-10.97) |

126 aHR: adjusted hazard ratio. CI: confidence interval. ICU: intensive care unit. OCS: oral corticosteroid. Hazard  
 127 ratios were derived using cox proportional hazard model adjusting for age, sex, socioeconomic status, body  
 128 mass index, number of risk groups of interest, number of non-asthma related hospitalisations within the two-  
 129 year period prior to March 1, 2020 and vaccine status. \* Two-year look back on all markers of history of an  
 130 asthma attack was from March 1, 2020. ICU/deaths include those had COVID-19 related ICU admissions or  
 131 COVID-19 related death with or without previous ICU admissions.

132 The aHR of severe COVID-19 outcomes comparing those with a history of asthma attack vs those with no  
 133 asthma is higher among those <50 years old compared to the general population. This is because the reference  
 134 group in the < 50 years old was at lower risk for severe COVID-19 outcomes (Figure S2) compared to the  
 135 general population. Our results show that for the <50 years old group, asthma had a stronger impact on severe  
 136 COVID-19 outcomes compared to the general population.

137  
138  
139

**Table S12: Hazard ratio for COVID-19 hospitalisation comparing those with different markers of history of an asthma attack (defined in the two years prior to March 1, 2020) and those with no asthma in adults – additionally adjusted for smoking status other than the risk factors in the main analysis**

|                                   |                                      | COVID-19 hospitalisation | COVID-19 hospitalisation |
|-----------------------------------|--------------------------------------|--------------------------|--------------------------|
| Variable                          | Level                                | Adjusted HR (95% CI)     | Adjusted HR (95% CI)     |
| Age                               | linear                               | 1.03 (1.03-1.03)         | 1.03 (1.03-1.03)         |
|                                   | nonlinear                            | NA                       | NA                       |
| Sex                               | Female                               | 1                        | 1                        |
|                                   | Male                                 | 1.11 (1.08-1.14)         | 1.12 (1.09-1.15)         |
| SIMD                              | 1 - High                             | 1                        | 1                        |
|                                   | 2                                    | 0.79 (0.76-0.82)         | 0.79 (0.76-0.82)         |
|                                   | 3                                    | 0.59 (0.56-0.61)         | 0.59 (0.56-0.61)         |
|                                   | 4                                    | 0.54 (0.51-0.56)         | 0.54 (0.52-0.56)         |
|                                   | 5-Low                                | 0.5 (0.48-0.53)          | 0.51 (0.48-0.53)         |
| Prior hospitalisation             | 0                                    | 1                        | 1                        |
|                                   | 1                                    | 1.62 (1.56-1.67)         | 1.6 (1.54-1.66)          |
|                                   | 2                                    | 1.93 (1.85-2.02)         | 1.89 (1.81-1.98)         |
|                                   | 3+                                   | 2.94 (2.83-3.06)         | 2.82 (2.71-2.94)         |
| Number of risk groups             | 0                                    | 1                        | 1                        |
|                                   | 1                                    | 1.67 (1.61-1.73)         | 1.67 (1.61-1.73)         |
|                                   | 2                                    | 2.5 (2.39-2.61)          | 2.47 (2.37-2.58)         |
|                                   | 3                                    | 3.13 (2.98-3.3)          | 3.07 (2.92-3.23)         |
|                                   | 4                                    | 3.65 (3.43-3.88)         | 3.55 (3.34-3.77)         |
|                                   | 5+                                   | 4.65 (4.36-4.96)         | 4.46 (4.18-4.76)         |
| BMI (kg/m2)                       | <18.5                                | 1                        | 1                        |
|                                   | 18.5-24.99                           | 0.78 (0.71-0.87)         | 0.8 (0.72-0.88)          |
|                                   | 25-29.99                             | 0.84 (0.76-0.93)         | 0.86 (0.78-0.95)         |
|                                   | 30-34.99                             | 1.09 (0.99-1.21)         | 1.12 (1.01-1.24)         |
|                                   | ≥35                                  | 1.37 (1.24-1.52)         | 1.4 (1.27-1.55)          |
| Vaccine status                    | Unvaccinated                         | 1                        | 1                        |
|                                   | 0-27 days post 1st dose              | 0.69 (0.65-0.74)         | 0.69 (0.66-0.74)         |
|                                   | 28+ post 1st dose                    | 0.26 (0.24-0.29)         | 0.26 (0.24-0.29)         |
|                                   | 0-27 post 2nd dose                   | 0.22 (0.19-0.25)         | 0.22 (0.19-0.25)         |
|                                   | 28+ post 2nd dose                    | 0.15 (0.14-0.16)         | 0.15 (0.14-0.16)         |
| Smoking status                    | Never                                | 1                        | 1                        |
|                                   | Ex smoker                            | 1.02 (0.98-1.05)         | 1.01 (0.97-1.04)         |
|                                   | Current smoker                       | 0.88 (0.85-0.91)         | 0.85 (0.82-0.88)         |
|                                   | Unknown                              | 0.61 (0.58-0.65)         | 0.6 (0.57-0.63)          |
| Prior hospitalisation for asthma* | No asthma                            | 1                        | -                        |
|                                   | Asthma without prior hospitalisation | 1.23 (1.18-1.27)         | -                        |
|                                   | Asthma with prior hospitalisation    | 2.98 (2.57-3.46)         | -                        |
| Prior OCS prescriptions*          | No asthma                            | -                        | 1                        |
|                                   | Asthma with 0 course of OCS          | -                        | 1.14 (1.09-1.19)         |



|  |                               |   |                  |
|--|-------------------------------|---|------------------|
|  | Asthma with 1 course of OCS   | - | 1.32 (1.25-1.4)  |
|  | Asthma with 2 courses of OCS  | - | 1.41 (1.3-1.52)  |
|  | Asthma with ≥3 courses of OCS | - | 1.59 (1.51-1.66) |

140 aHR: adjusted hazard ratio. CI: confidence interval. OCS: oral corticosteroid. Hazard ratios were derived using  
141 cox proportional hazard model adjusting for age, sex, socioeconomic status, body mass index, number of risk  
142 groups of interest, number of non-asthma related hospitalisations within the two-year period prior to March 1,  
143 2020 and vaccine status and smoking status. \* Two-year look back on both markers of history of an asthma  
144 attack was from March 1, 2020. 42% of the cohort had missing ethnicity so this variable was not adjusted for in  
145 the Cox model. 1% of the cohort had missing SIMD or BMI and this 1% were excluded in the adjusted Cox  
146 model.  
147

148

149

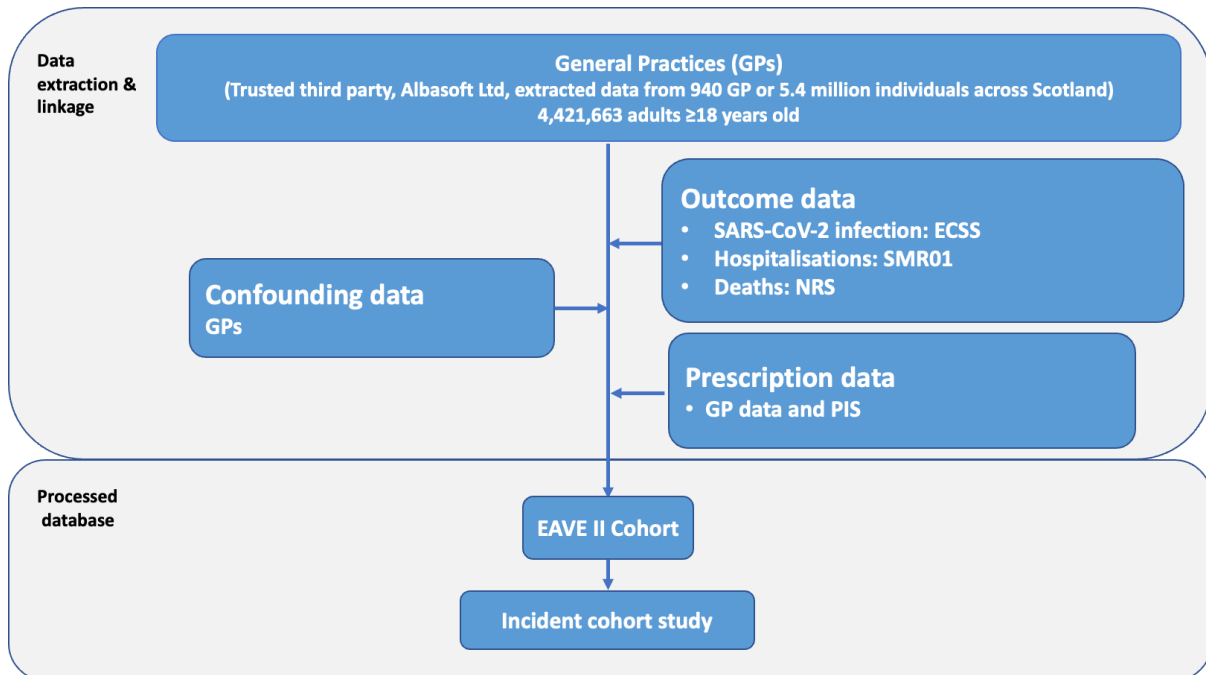

150

151

152

153

154

155

Community Health Index (CHI) numbers were used to link all datasets. ECSS: Electronic Communication of Surveillance in Scotland. SMR: Scottish Morbidity Record. NRS: National Records of Scotland. PIS: Prescribing Information System.

Figure S1: Data linkage diagram

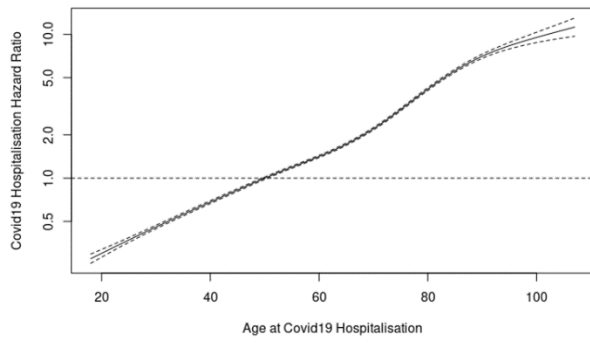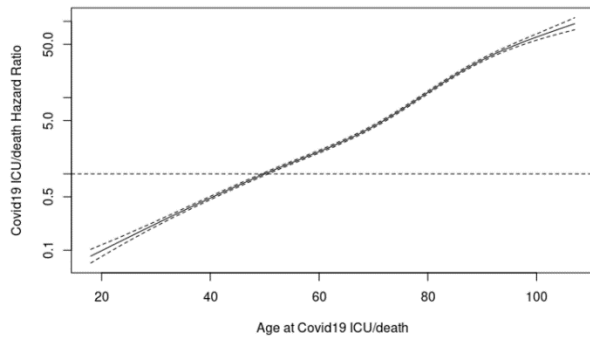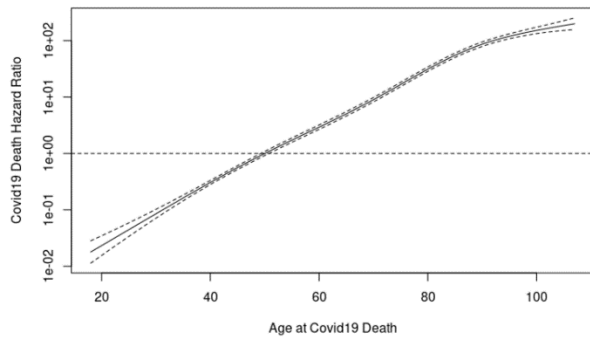

156

157

158

*Figure S2: unadjusted non-linear age effect on COVID-19 hospitalisation, ICU admissions and death. Penalised splines were used in the statistical modelling.*

159
